# Supplementary material
Source: MDPI journal article supplement (https://www.mdpi.com/2073-4344/12/10/1276)
Supplement: s1 [file s1]

# Two-dimensional Fe-N-C nanosheets for efficient oxygen reduction reaction

## Experimental Section:

### Chemical reagent and characterization:

Zinc chloride anhydrous ( $\text{ZnCl}_2$ , >98%) and 2-Methylimidazole (>98%) were obtained from Beijing Innochem Science & Technology co., LTD., Ferric chloride hexahydrate ( $\text{FeCl}_3 \cdot 6\text{H}_2\text{O}$ , >99%) was purchased Beijing Chemical works. Structure and morphology of prepared catalysts were characterized by scanning electron microscopy (SEM, JSM-7610FPlus, Guangdong, China) with an accelerating voltage of 15 kV. High-resolution transmission (HRTEM) and high angle annular dark-field (HAADF-STEM) (JEM ARM200F, Tokyo, Japan) was performed to explore Fe nanoparticles and atomically dispersed Fe. Powder X-ray diffraction (XRD, Regaku D/Max-2500, Tokyo, Japan) was carried out under Cu  $K\alpha$  radiation at a scanning speed of 5 °/s. X-ray photoelectron spectroscopy (XPS, Scientific EscaLab Xi+, Shanghai, China) was conducted by using an Monochromated Al Ka source under the condition of 1486.6 eV and 15 kV. C 1s at 284.80 eV was used as an internal binding energy standard for correcting charging effects.

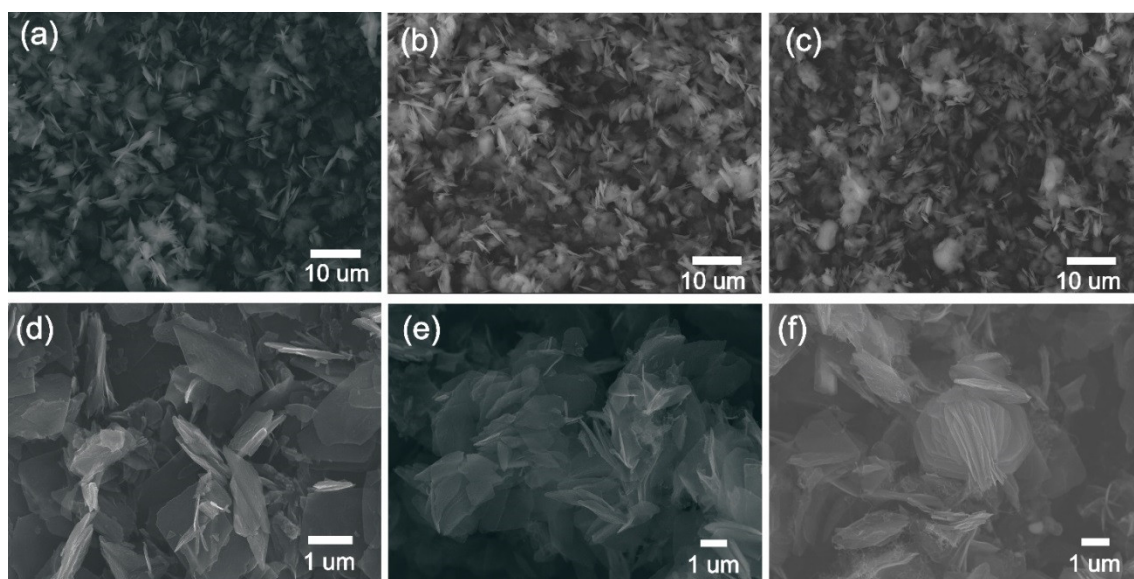

Figure S1. SEM images of Fe/Zn-ZIFs (a–c) and Fe/NCNS (d–f).

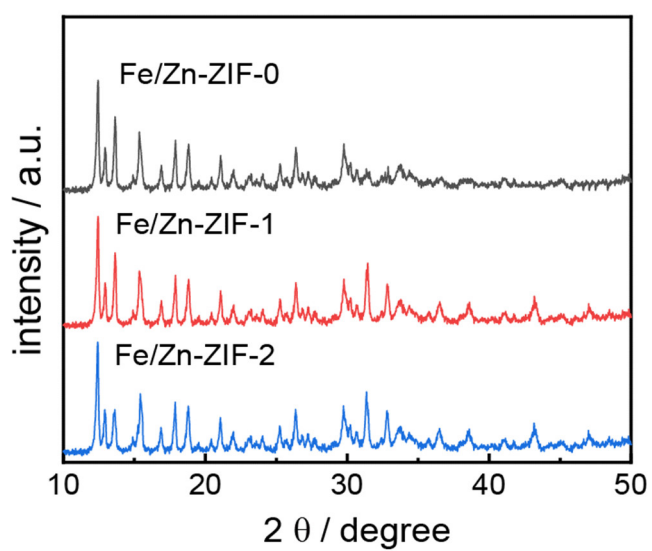

Figure S2. XRD patterns of Fe/Zn-ZIF-0, Fe/Zn-ZIF-1 and Fe/Zn-ZIF-2.

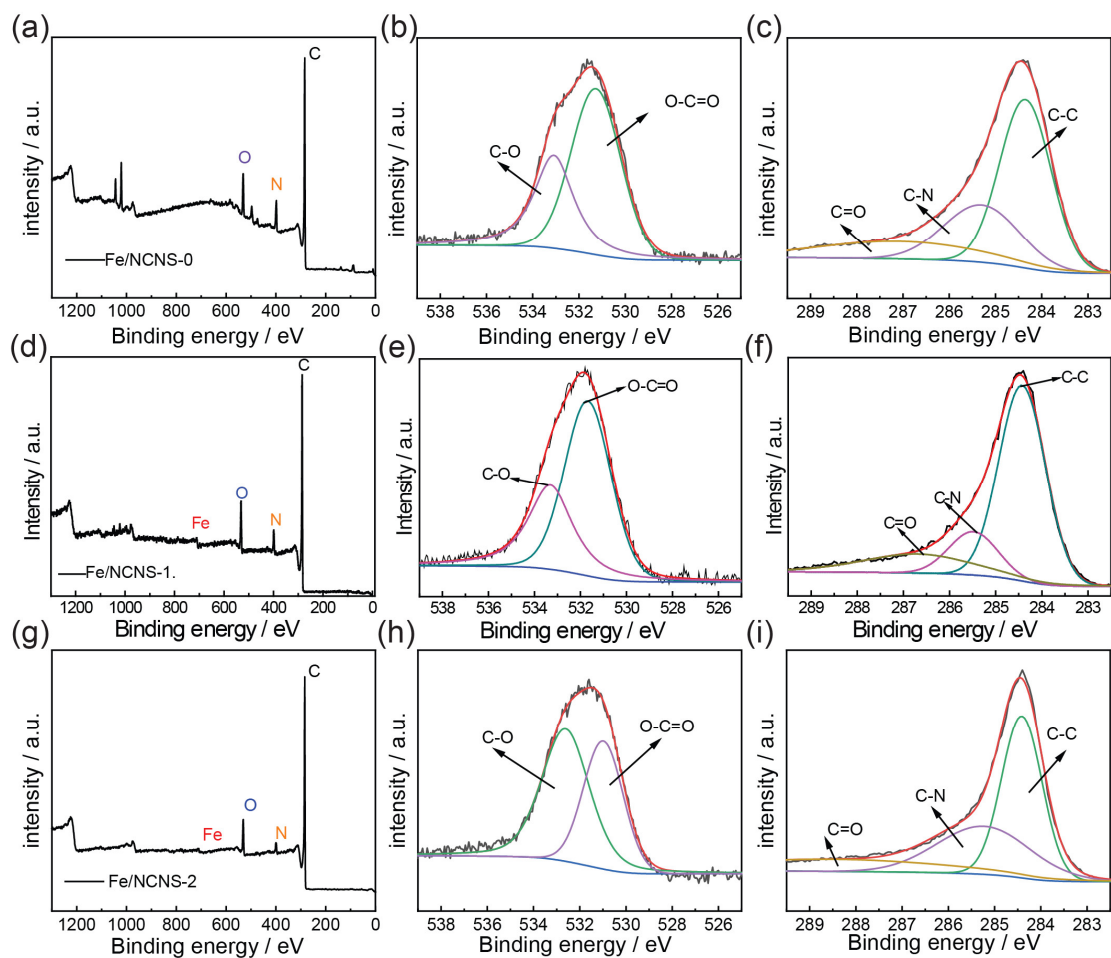

Figure S3. XPS spectra, O 1s spectra and C 1s spectra of Fe/NCNS-0 (a–c), Fe/NCNS-1 (d–f) and Fe/NCNS-2 (g–i).

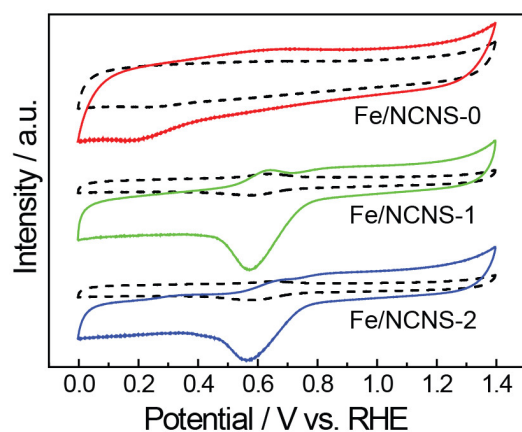

Figure S4. CV curves (scan rate:  $50 \text{ mV} \cdot \text{s}^{-1}$ ) in  $\text{N}_2$  saturated (black dot line) and  $\text{O}_2$  saturated (solid line)  $0.5 \text{ M H}_2\text{SO}_4$ .

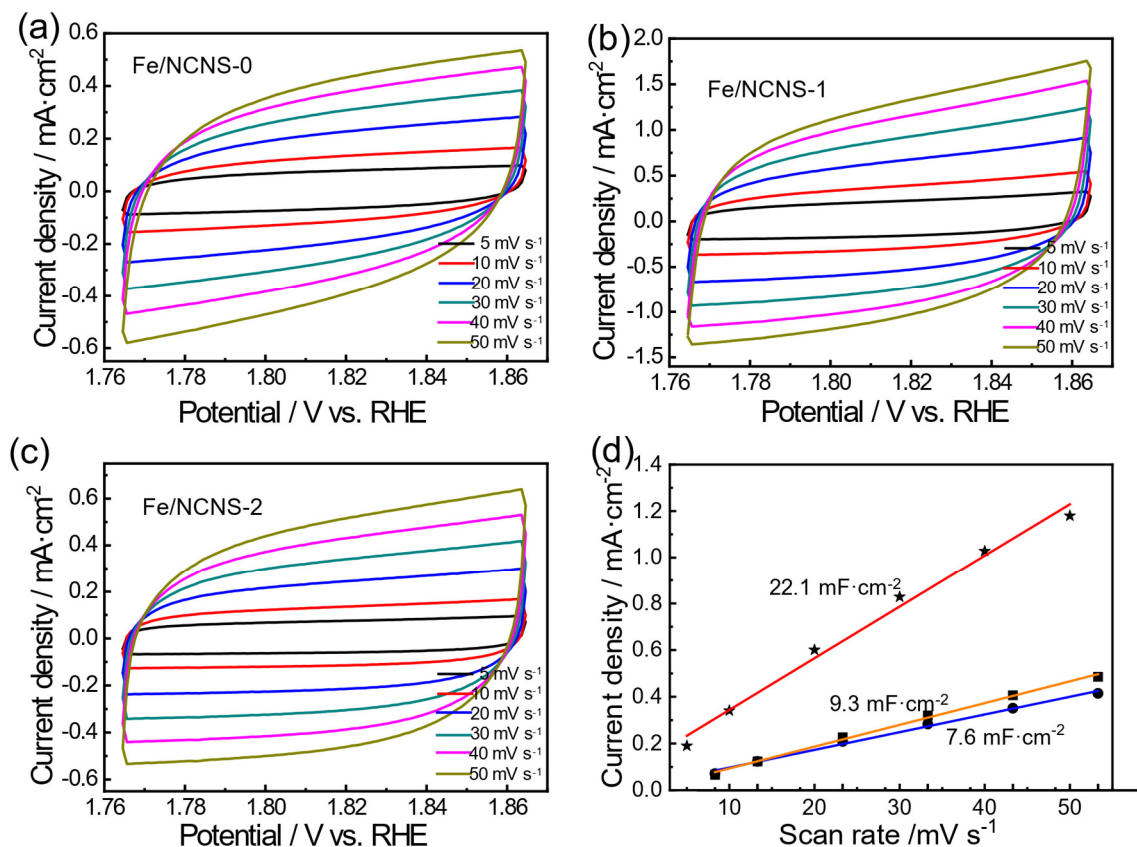

Figure S5. CV curves of Fe/NCNS-0 (a), Fe/NCNS-1 (b) and Fe/NCNS-2 (c) at 5, 10, 20, 30, 40, 50 mV·s<sup>-1</sup> in 0.5 M H<sub>2</sub>SO<sub>4</sub> and corresponding correlation between the current density at 1.81 V and the scan rate (d).

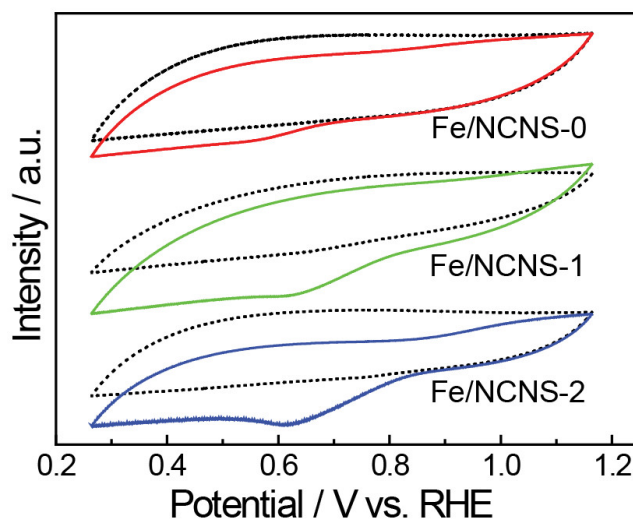

Figure S6. CV curves (scan rate: 50 mV·s<sup>-1</sup>) in N<sub>2</sub> saturated (black dot line) and O<sub>2</sub> saturated (solid line) 0.1 M KOH.

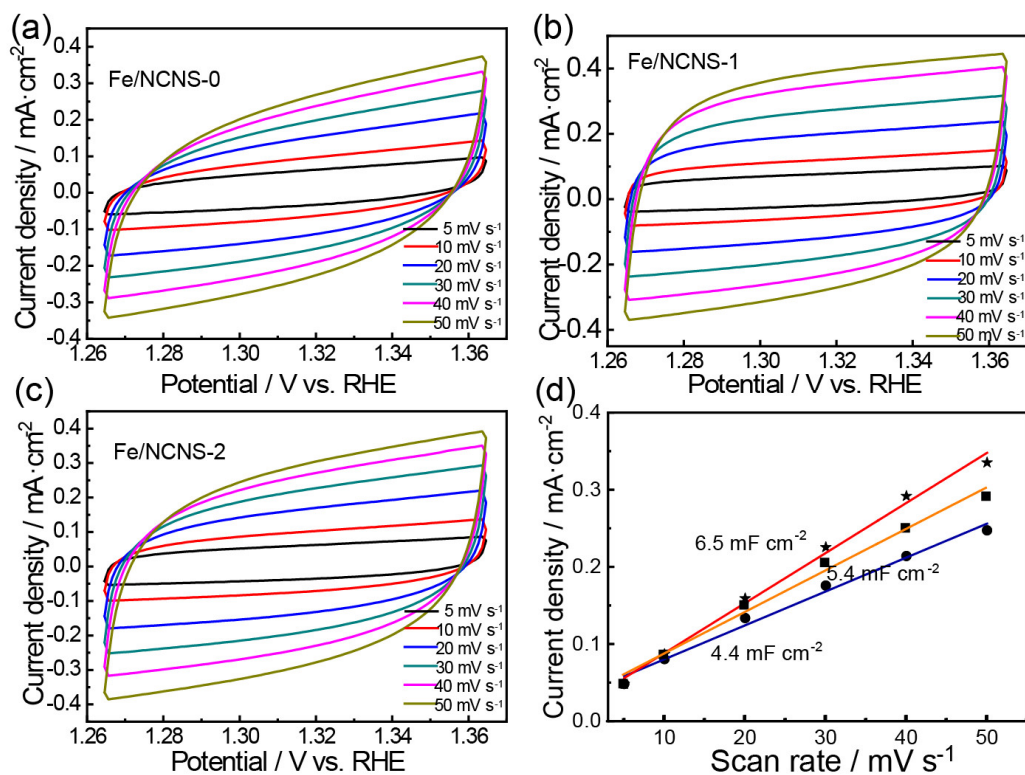

Figure S7. CV curves of Fe/NCNS-0 (a), Fe/NCNS-1 (b) and Fe/NCNS-2 (c) at 5, 10, 20, 30, 40, 50 mV·s<sup>-1</sup> in 0.1 M KOH and corresponding correlation between the current density at 1.31 V and the scan rate (d).

Table S1 The comparison of ORR activity of Fe/NCNS-1 with reported Fe-based catalysts in acidic electrolyte.

| Material                                     | Electrolyte                          | Half-wave potential | Pt/C            | $\Delta(E_{1/2} \text{ Pt/C} - E_{1/2} \text{ material})$ | Electron transfer number | Ref.      |
|----------------------------------------------|--------------------------------------|---------------------|-----------------|-----------------------------------------------------------|--------------------------|-----------|
| HP-FeN <sub>4</sub>                          | 0.5 M H <sub>2</sub> SO <sub>4</sub> | 0.80 V vs. RHE      | N/A             | N/A                                                       | 3.8                      | [1]       |
| SA-Fe-HPC                                    | 0.1 M H <sub>2</sub> SO <sub>4</sub> | 0.81 V vs. RHE      | 0.84 V vs. RHE  | 30 mV                                                     | 4                        | [2]       |
| FeSAs/PTF-400                                | 0.1 M HClO <sub>4</sub>              | N/A                 | N/A             | N/A                                                       | 3.99                     | [3]       |
| FeN <sub>4</sub> /HOPC-c-1000                | 0.5 M H <sub>2</sub> SO <sub>4</sub> | 0.80 V vs. RHE      | N/A             | 20 mV                                                     | 3.97                     | [4]       |
| Fe@NMC-1                                     | 0.1 M HClO <sub>4</sub>              | 0.78 V vs. RHE      | 0.80 vs. RHE    | 20 mV                                                     | 3.86–3.91                | [5]       |
| meso-M-N-C/N-G                               | 0.1 M HClO <sub>4</sub>              | 0.72 V vs. RHE      | 0.73 V vs. RHE  | 10 mV                                                     | 3.76–3.94                | [6]       |
| Co-NOPC                                      | 0.5 M H <sub>2</sub> SO <sub>4</sub> | 0.76 V vs. RHE      | 0.82 V vs. RHE  | 60 mV                                                     | N/A                      | [7]       |
| Z8-Fe-P                                      | 0.1 M HClO <sub>4</sub>              | 0.744 V vs. RHE     | 0.758 V vs. RHE | 14 mV                                                     | N/A                      | [8]       |
| C-FeHZ8@g-C <sub>3</sub> N <sub>4</sub> -950 | 0.1 M HClO <sub>4</sub>              | 0.78 V vs. RHE      | 0.84 V vs. RHE  | 60 mV                                                     | 3.7                      | [9]       |
| Fe-N-C/HPC-NH <sub>3</sub>                   | 0.1 M HClO <sub>4</sub>              | 0.803 V vs. RHE     | 0.846 V vs. RHE | 43 mV                                                     | 3.95                     | [10]      |
| Fe/NCNS-1                                    | 0.5 M H <sub>2</sub> SO <sub>4</sub> | 0.725 V vs. RHE     | 0.748 V vs. RHE | 23 mV                                                     | 3.98                     | This work |

Table S2 The comparison of Fe-N-C material electrocatalyst with reported in Zn-air batteries.

| Materials                | Open Circuit Voltage (V) | Power Density (mW•cm <sup>-2</sup> ) | Loading Amount (mg•cm <sup>-2</sup> ) | Ref.      |
|--------------------------|--------------------------|--------------------------------------|---------------------------------------|-----------|
| Fe-TTF-800               | 1.55                     | 214                                  | 2.0                                   | [11]      |
| Fe-SA/NCF                | 1.45                     | 119                                  | 1.2                                   | [12]      |
| 5Fe-DPC                  | 1.47                     | 254                                  | 1.5                                   | [13]      |
| Fe-1                     | 1.47                     | 201                                  | 1.0                                   | [14]      |
| NiFe LDH@Fe-N-CNFs       | 1.48                     | 157                                  | 1.0                                   | [15]      |
| Fe-SA-FPCS               | 1.51                     | 168                                  | 1.5                                   | [16]      |
| Fe <sub>3</sub> C-FeN/NC | 1.41                     | 166                                  | 1.3                                   | [17]      |
| Fe,Ni-N-C/N-CNT          | 1.46                     | 271                                  | 2.0                                   | [18]      |
| Fe/NCNS-1                | 1.69                     | 1590                                 | 5.0                                   | This Work |

## References

- [1] Zhang, N.; Zhou, T.; Chen, M.; Feng, H.; Yuan, R.; Zhong, C. A.; Yan, W.; Tian, Y.; Wu, X.; Chu, W.; Wu, C.; Xie, Y. High-purity pyrrole-type FeN<sub>4</sub> sites as a superior oxygen reduction electrocatalyst. *Energy Environ. Sci.* **2020**, *13*, 111-118
- [2] Zhang, Z.; Sun, J.; Wang, F.; Dai, L. Efficient oxygen reduction reaction (ORR) catalysts based on single iron atoms dispersed on a hierarchically structured porous carbon framework. *Angew Chem., Int Ed Engl.* **2018**, *57*, 9038-9043.
- [3] Yi, J. D.; Xu, R.; Wu, Q.; Zhang, T.; Zang, K. T.; Luo, J.; Liang, Y. L.; Huang, Y.B.; Cao, R. Atomically dispersed iron-nitrogen active sites within porphyrinic triazine-based frameworks for oxygen reduction reaction in both alkaline and acidic media. *ACS Energy Letters.* **2018**, *3*, 883-889.
- [4] Qiao, M.; Wang, Y.; Wang, Q.; Hu, G.; Mamat, X.; Zhang, S.; Wang, S. Hierarchically ordered porous carbon with atomically dispersed FeN<sub>4</sub> for ultraefficient oxygen reduction reaction in proton-exchange membrane fuel cells. *Angew. Chem. Int. Ed.* **2020**, *59*, 2688-2694.
- [5] Chen, X.; Wang, N.; Shen, K.; Xie, Y.; Tan, Y.; Li, Y. Mof-derived isolated Fe atoms implanted in N-doped 3D hierarchical carbon as an efficient ORR electrocatalyst in both alkaline and acidic media. *ACS Appl. Mater. Interfaces.* **2019**, *11*, 25976-25985.
- [6] Huo, L.L.; Liu, B. C.; Zhang, G.; Zhang, J. 2D Layered non-precious metal mesoporous electrocatalysts for enhanced oxygen reduction reaction. *J. Mater. Chem. A.* **2017**, *5*, 4868-4878.
- [7] Qiao, M.; Wang, Y.; Mamat, X.; Chen, A.; Zou, G.; Li, L.; Hu, G.; Zhang, S.; Hu, X.; Voiry, D. Rational design of hierarchical, porous, Co-supported, N-doped carbon architectures as

- electrocatalyst for oxygen reduction. *ChemSusChem*, **2020**, *13*, 741-748.
- [8] Qian, Y.; Liu, Q.; Sarnello, E.; Tang, C.; Chng, M.; Shui, J.; Li, T.; Pennycook, S. J.; Han, M.; Zhao, D. Mof-derived carbon networks with atomically dispersed Fe-N<sub>x</sub> sites for oxygen reduction reaction catalysis in acidic media. *ACS Appl. Mater. Interfaces*. **2019**, *1*, 37-43.
- [9] Deng, Y.; Chi, B.; Tian, X.; Cui, Z.; Liu, E.; Jia, Q.; Fan, W.; Wang, G.; Dang, D.; Li, M.; Zang, K.; Luo, J.; Hu, Y.; Liao, S.; Sun, X.; Mukerjee, S. g-C<sub>3</sub>N<sub>4</sub> promoted mof derived hollow carbon nanopolyhedra doped with high density/fraction of single fe atoms as an ultra-high performance non-precious catalyst towards acidic orr and pem fuel cells. *J. Mater. Chem. A*. **2019**, 5020-5030.
- [10] Liu, X.; Liu, H.; Chen, C.; Zou, L.; Li, Y.; Zhang, Q.; Yang, B.; Zou, Z.; Yang, H. Fe<sub>2</sub>N nanoparticles boosting FeN<sub>x</sub> moieties for highly efficient oxygen reduction reaction in Fe-N-C porous catalyst. *J. Nano Research*. **2019**, *12*, 1651-1657.
- [11] Zhu, Z.-H.; Yu, B.; Sun, W.; Chen, S.; Wang, Y.; Li, X.; Lv, L.P. Triazine organic framework derived Fe single-atom bifunctional electrocatalyst for high performance zinc air batteries. *J Power Sources*. **2022**, 542.
- [12] Wang, W.; Rui, K.; Wu, K.; Wang, Y.; Ke, L.; Wang, X.; Xu, F.; Lu, Y.; Zhu, J. Molecular Bridging Enables Isolated Iron Atoms on Stereoassembled Carbon Framework To Boost Oxygen Reduction for Zinc-Air Batteries. *Chemistry*. **2022**, 2840, e202200789.
- [13] Wu, G.; Shao, C.; Cui, B.; Chu, H.; Qiu, S.; Zou, Y.; Xu, F.; Sun, L. Honeycomb-like Fe/Fe<sub>3</sub>C-doped porous carbon with more Fe-N<sub>x</sub> active sites for promoting the electrocatalytic activity of oxygen reduction. *Sustainable Energy & Fuels*. **2021**, *520*, 5295-5304.
- [14] Sheng, J.; Sun, S.; Jia, G.; Zhu, S.; Li, Y. Doping Effect on Mesoporous Carbon-Supported Single-Site Bifunctional Catalyst for Zinc-Air Batteries. *ACS Nano*. **2022**.
- [15] Wu, D.; Hu, X.; Yang, Z.; Yang, T.; Wen, J.; Lu, G.; Zhao, Q.; Li, Z.; Jiang, X.; Xu, C. NiFe LDH Anchoring on Fe/N-Doped Carbon Nanofibers as a Bifunctional Electrocatalyst for Rechargeable Zinc-Air Batteries. *Ind Eng Chem Res*. **2022**, 6122, 7523-7528.
- [16] Zhu, Y.; Wang, X.; Shi, J.; Gan, L.; Huang, B.; Tao, L.; Wang, S. Neuron-inspired design of hierarchically porous carbon networks embedded with single-iron sites for efficient oxygen reduction. *Sci China Chem*. **2022**, 657, 1445-1452.
- [17] Zhou, F.; Yu, P.; Sun, F.; Zhang, G.; Liu, X.; Wang, L. The cooperation of Fe<sub>3</sub>C nanoparticles with isolated single iron atoms to boost the oxygen reduction reaction for Zn-air batteries. *J. Mater. Chem. A*. **2021**, 911, 6831-6840.
- [18] Fang, J.; Zhang, X.; Wang, X.; Liu, D.; Xue, Y.; Xu, Z.; Zhang, Y.; Song, C.; Zhu, W.; Zhuang, Z. A metal and nitrogen doped carbon composite with both oxygen reduction and evolution active sites for rechargeable zinc-air batteries. *J. Mater. Chem. A*. **2020**, 831, 15752-15759.
